# Supplementary material for: Production of a reference transcriptome and transcriptomic database (EdwardsiellaBase) for the lined sea anemone, Edwardsiella lineata, a parasitic cnidarian
Source: PubMed Central journal article supplement (PMC3909931; doi:10.1186/1471-2164-15-71), 2014-01-28

| Taxon 1      | Taxon 2         | Upper Limit | Lower Limit | Source                                           |
|--------------|-----------------|-------------|-------------|--------------------------------------------------|
|              |                 |             |             |                                                  |
| Dendraster   | Encope          | -1          | 50          | Peterson et al., 2004                            |
| Dendraster   | Eucidaris       | -1          | 255         | Peterson et al., 2004                            |
| Dendraster   | Asterina        | -1          | 480         | Peterson et al., 2004                            |
| Dendraster   | Antedon         | 525         | 485         | Peterson et al., 2004                            |
| Dendraster   | Saccoglossus    | 565         | -1          | Peterson et al., 2008; Lieu et al., 2010         |
| M_edulis     | M_californianus | -1          | 20          | Peterson et al., 2004                            |
| M_edulis     | Modiolus        | -1          | 235         | Peterson et al., 2004                            |
| M_edulis     | Nucula          | -1          | 485         | Peterson et al., 2004                            |
| Haliotis     | Crepidula       | -1          | 500         | Peterson and Butterfield, 2005                   |
| M_edulis     | Crepidula       | 548         | 530         | Peterson et al., 2008                            |
| Lestes       | Enallagma       | -1          | 120         | Peterson et al., 2004                            |
| Drosophila   | Aedes           | 295         | 235         | Peterson et al., 2004; Benton and Donoghue, 2007 |
| Anopheles    | Enallagma       | -1          | 325         | Peterson et al., 2004                            |
| Drosophila   | Priapulid       | -1          | 522         | Benton and Donoghue, 2007                        |
| Drosophila   | Daphnia         | -1          | 500         | Walossek, 1995                                   |
| Daphnia      | Rhipicephalus   | -1          | 515         | Rota-Stabelli et al., 2010; Maloof et al., 2010  |
| Anolis       | Gallus          | 299         | 259         | Benton and Donoghue, 2007                        |
| Homo         | Gallus          | 330         | 312         | Benton and Donoghue, 2007                        |
| Homo         | Xenopus         | 350         | 330         | Benton and Donoghue, 2007                        |
| Homo         | Monodelphis     | 138         | 124         | Benton and Donoghue, 2007                        |
| Homo         | Rattus          | 100         | 61          | Benton and Donoghue, 2007                        |
| Homo         | Danio           | 421         | 416         | Benton and Donoghue, 2007                        |
| Dani         | Tetraodon       | 165         | 149         | Benton and Donoghue, 2007                        |
| Geodia       | Verongula       | 713         | -1          | Peterson et al., 2007' Sperling et al., 2010     |
| Nematostella | Acropora        | -1          | 520         | Hou et al., 2005; Zhang et al, 2008              |
| Nematostella | Hydra           | -1          | 503         | Cartwright et al., 2007                          |

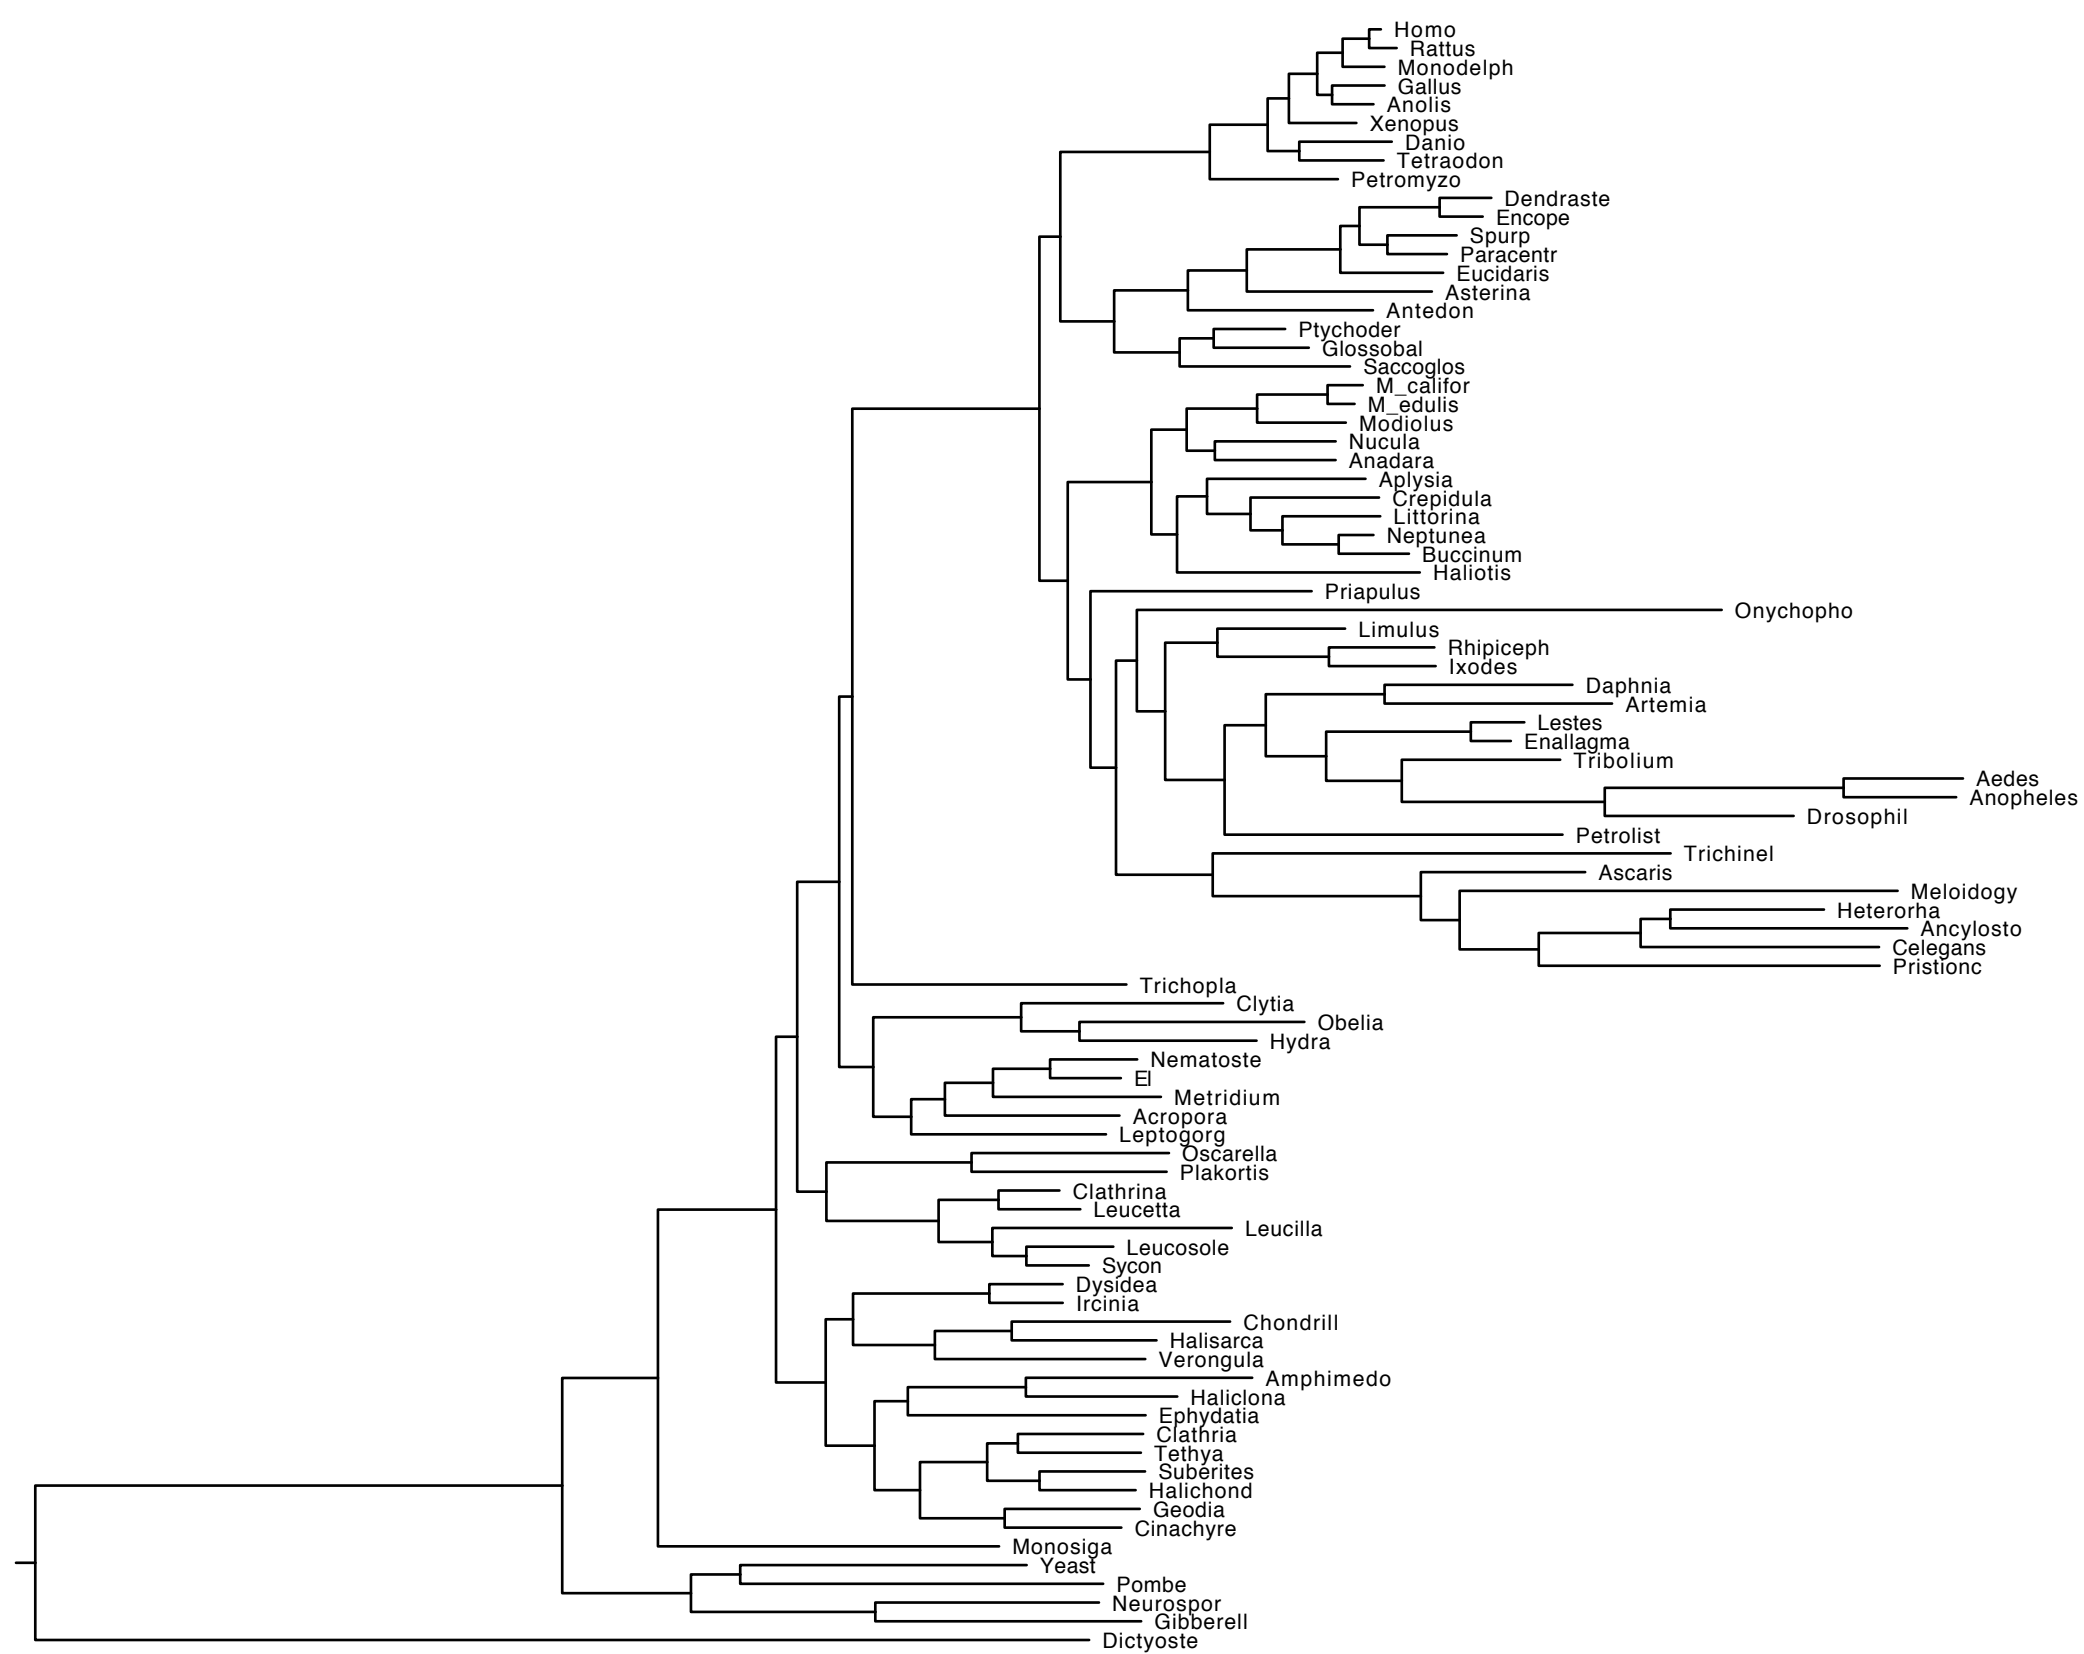

0.09

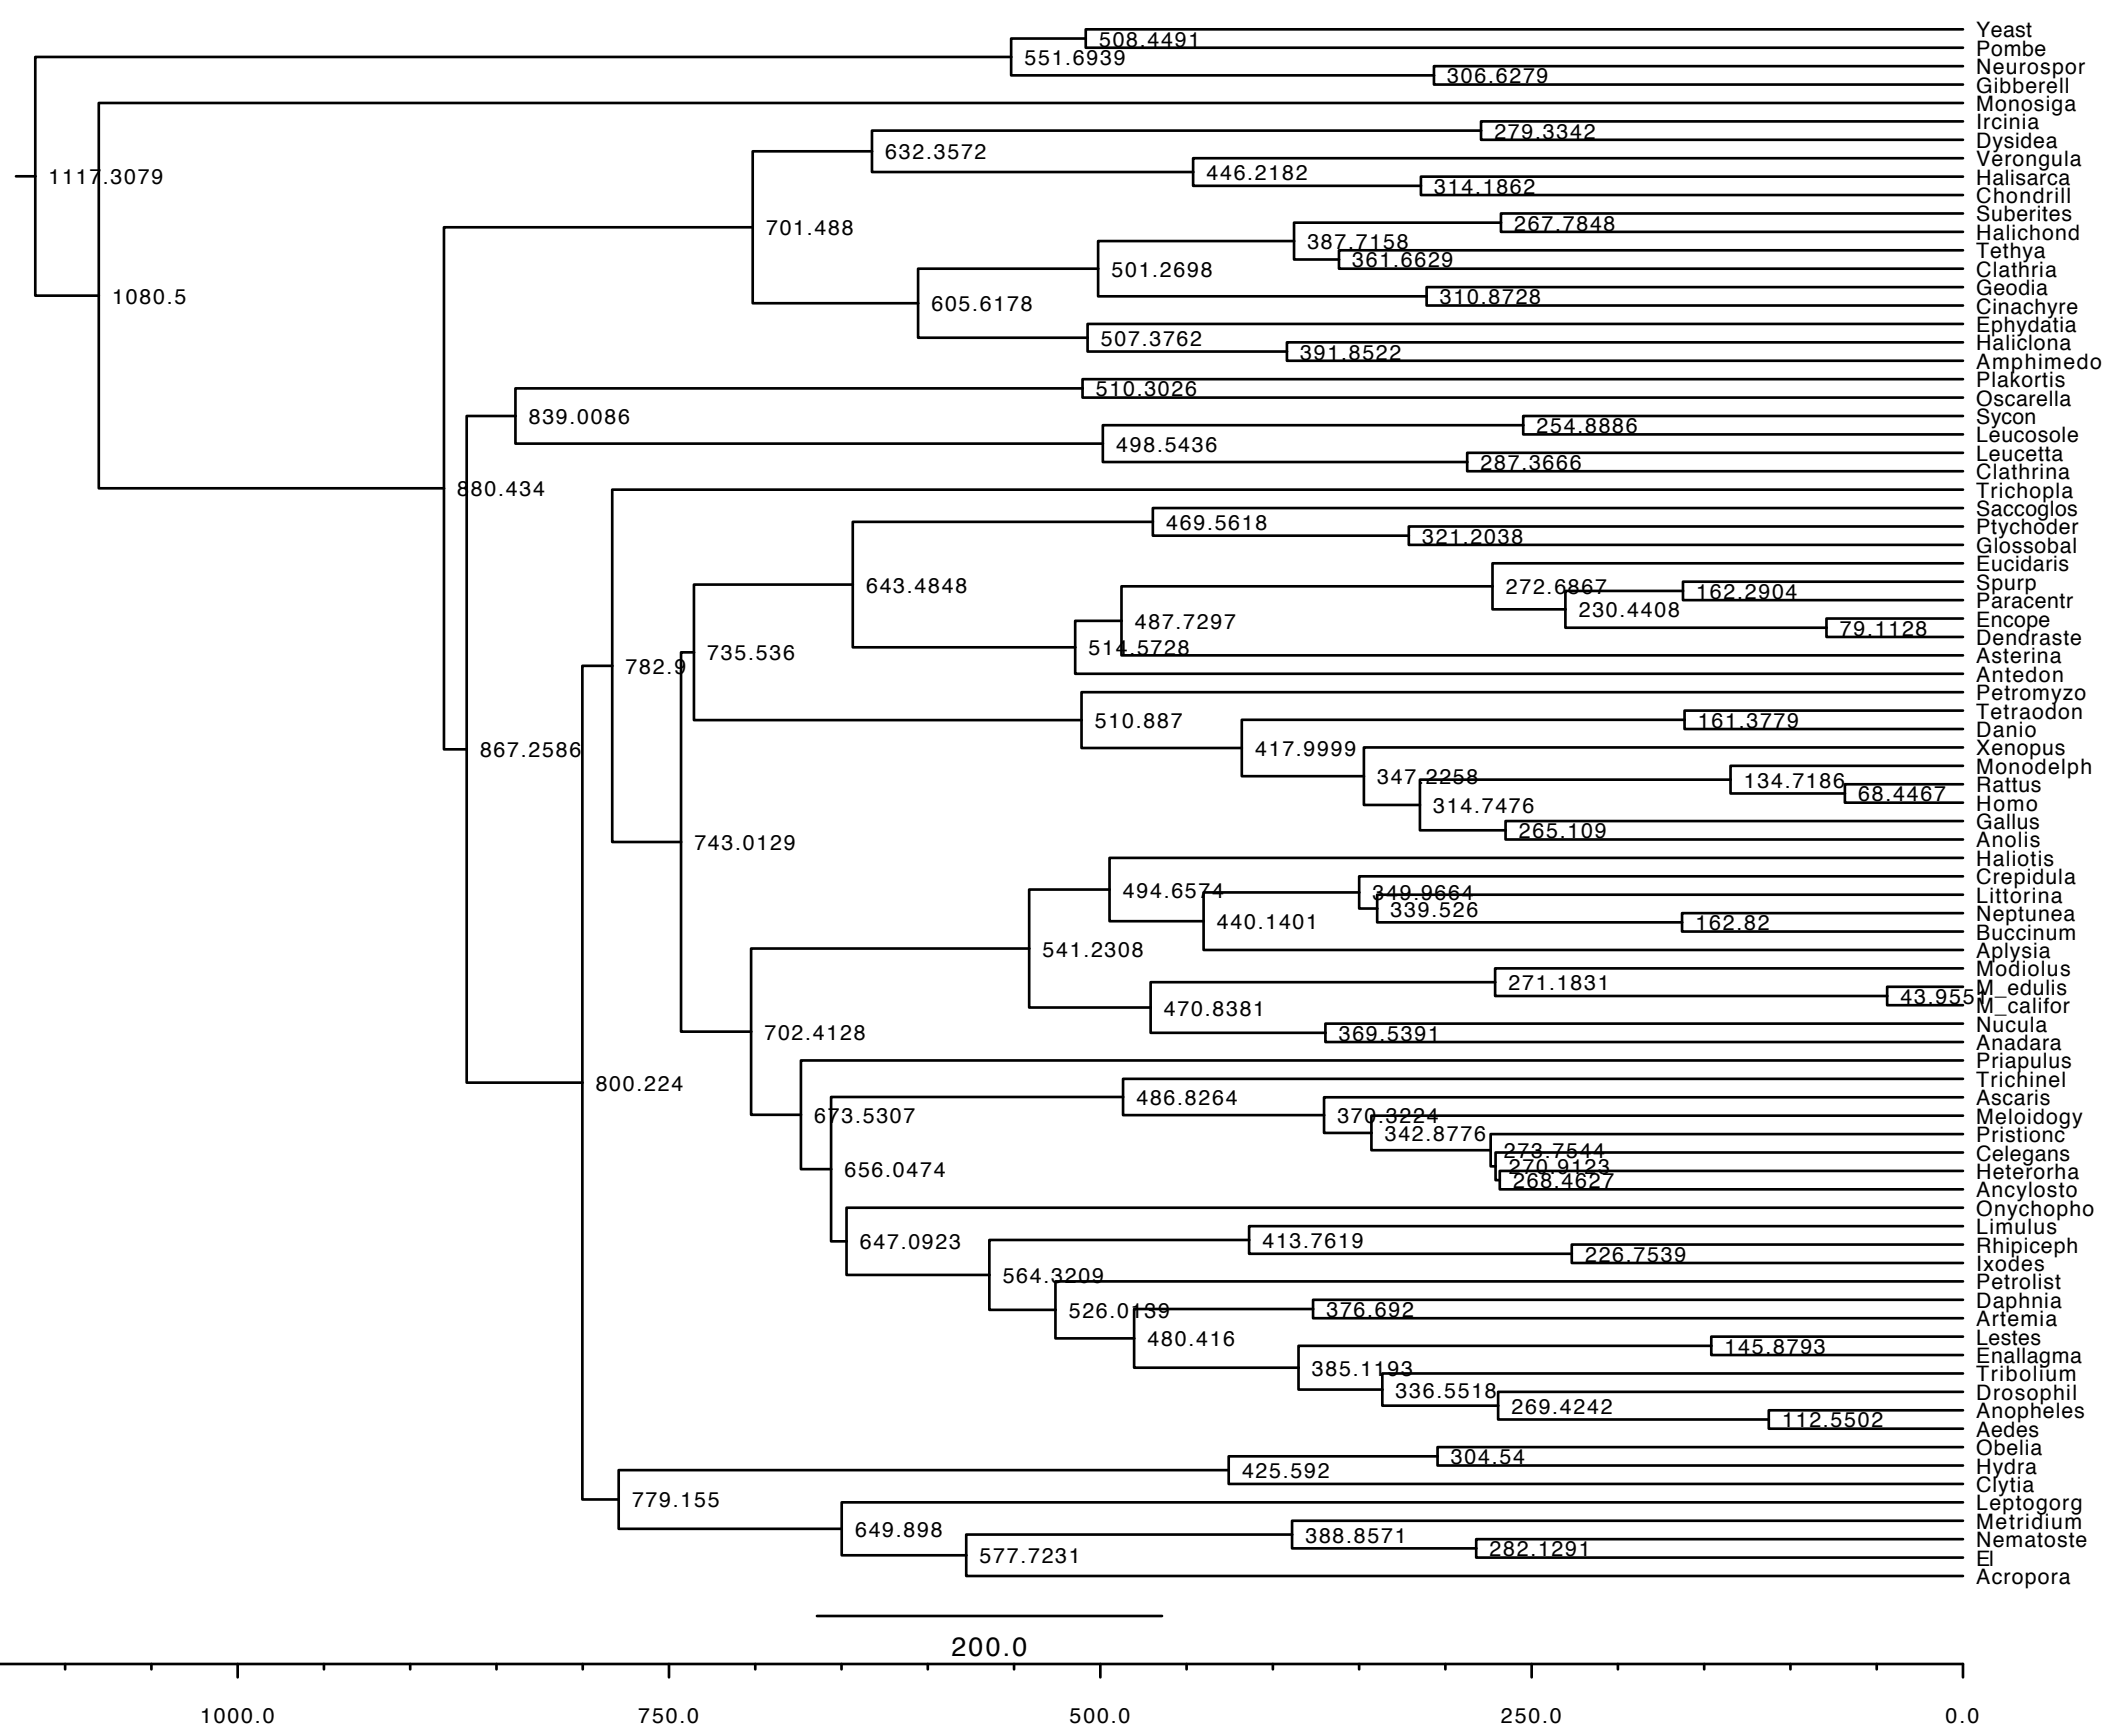

Supplement: 1471-2164-15-71-S2.pdf [file 1471-2164-15-71-S2.pdf]
