# Supplementary material for: Production of a reference transcriptome and transcriptomic database (EdwardsiellaBase) for the lined sea anemone, Edwardsiella lineata, a parasitic cnidarian
Source: PubMed Central journal article supplement (PMC3909931; doi:10.1186/1471-2164-15-71), 2014-01-28

# Biological Process

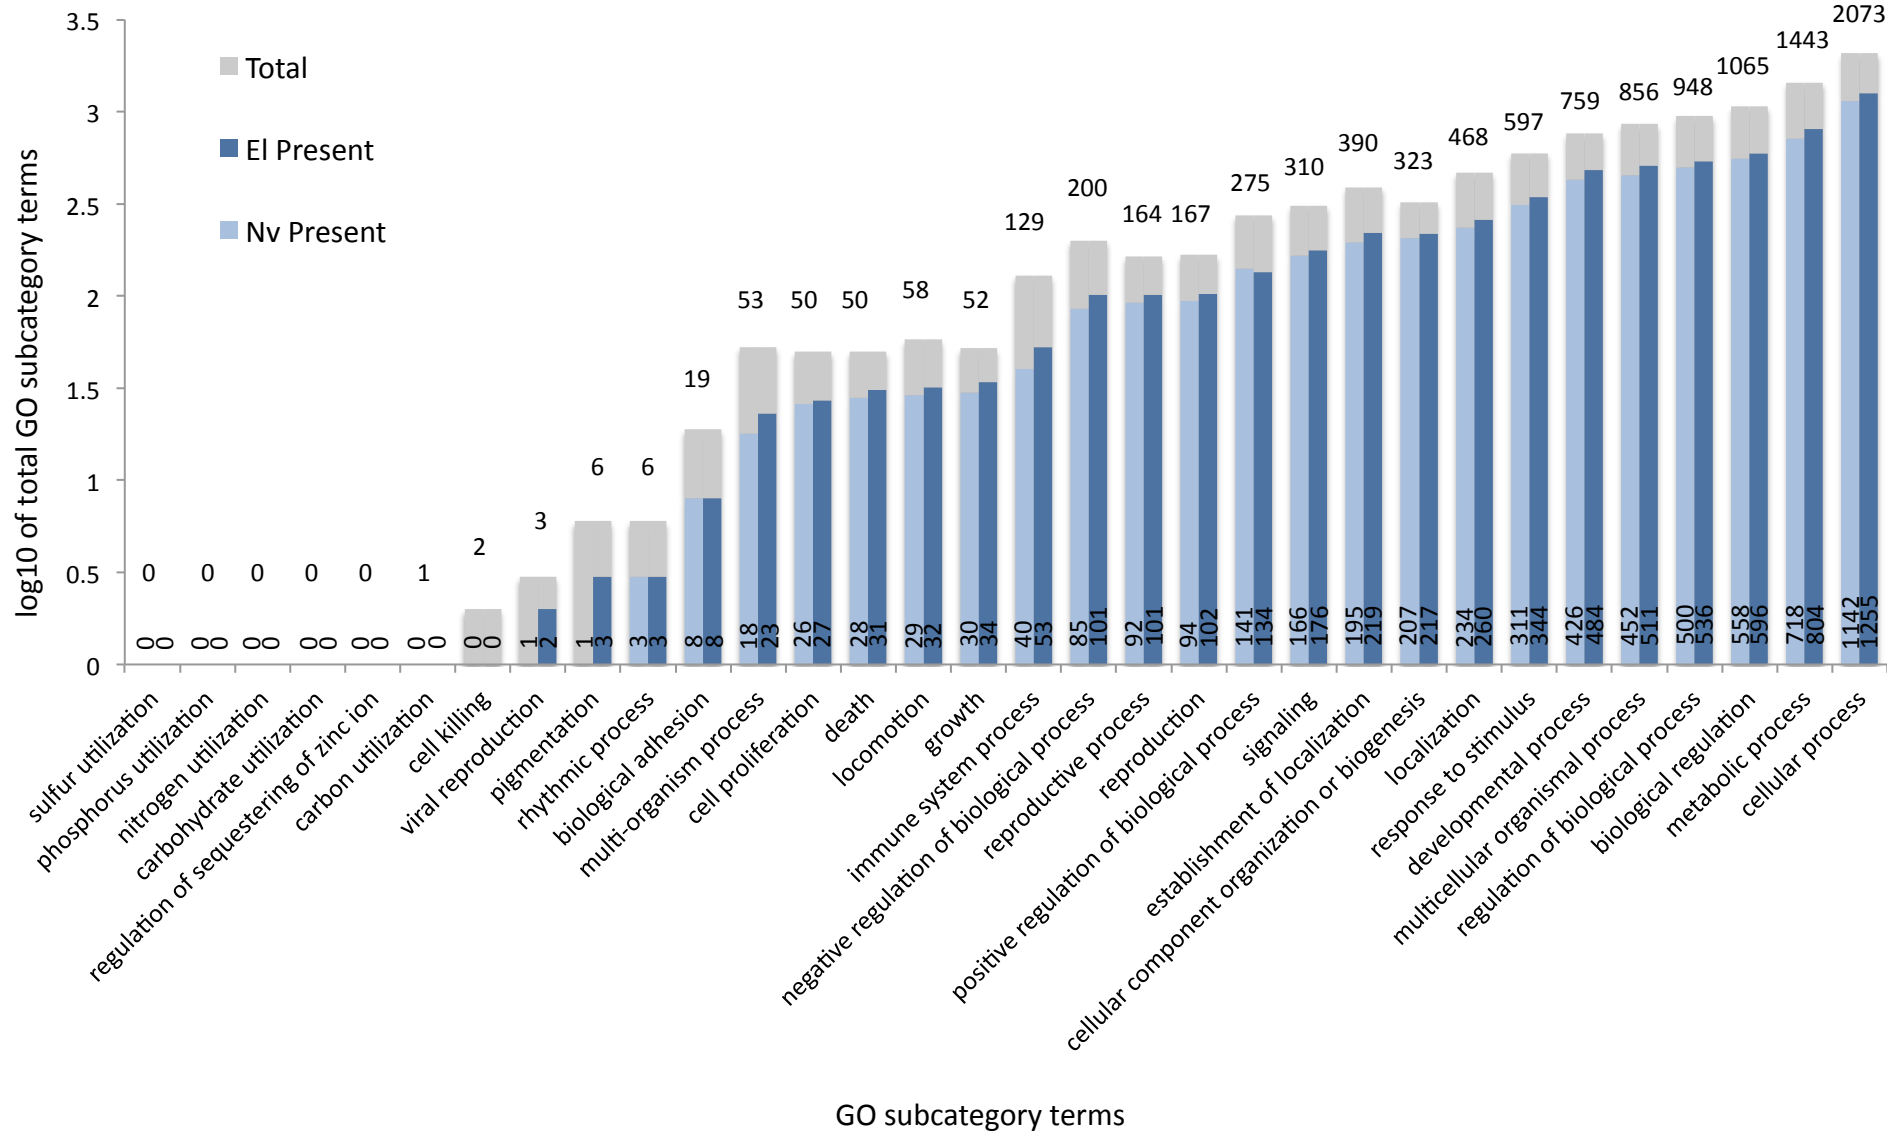

# Cellular Component

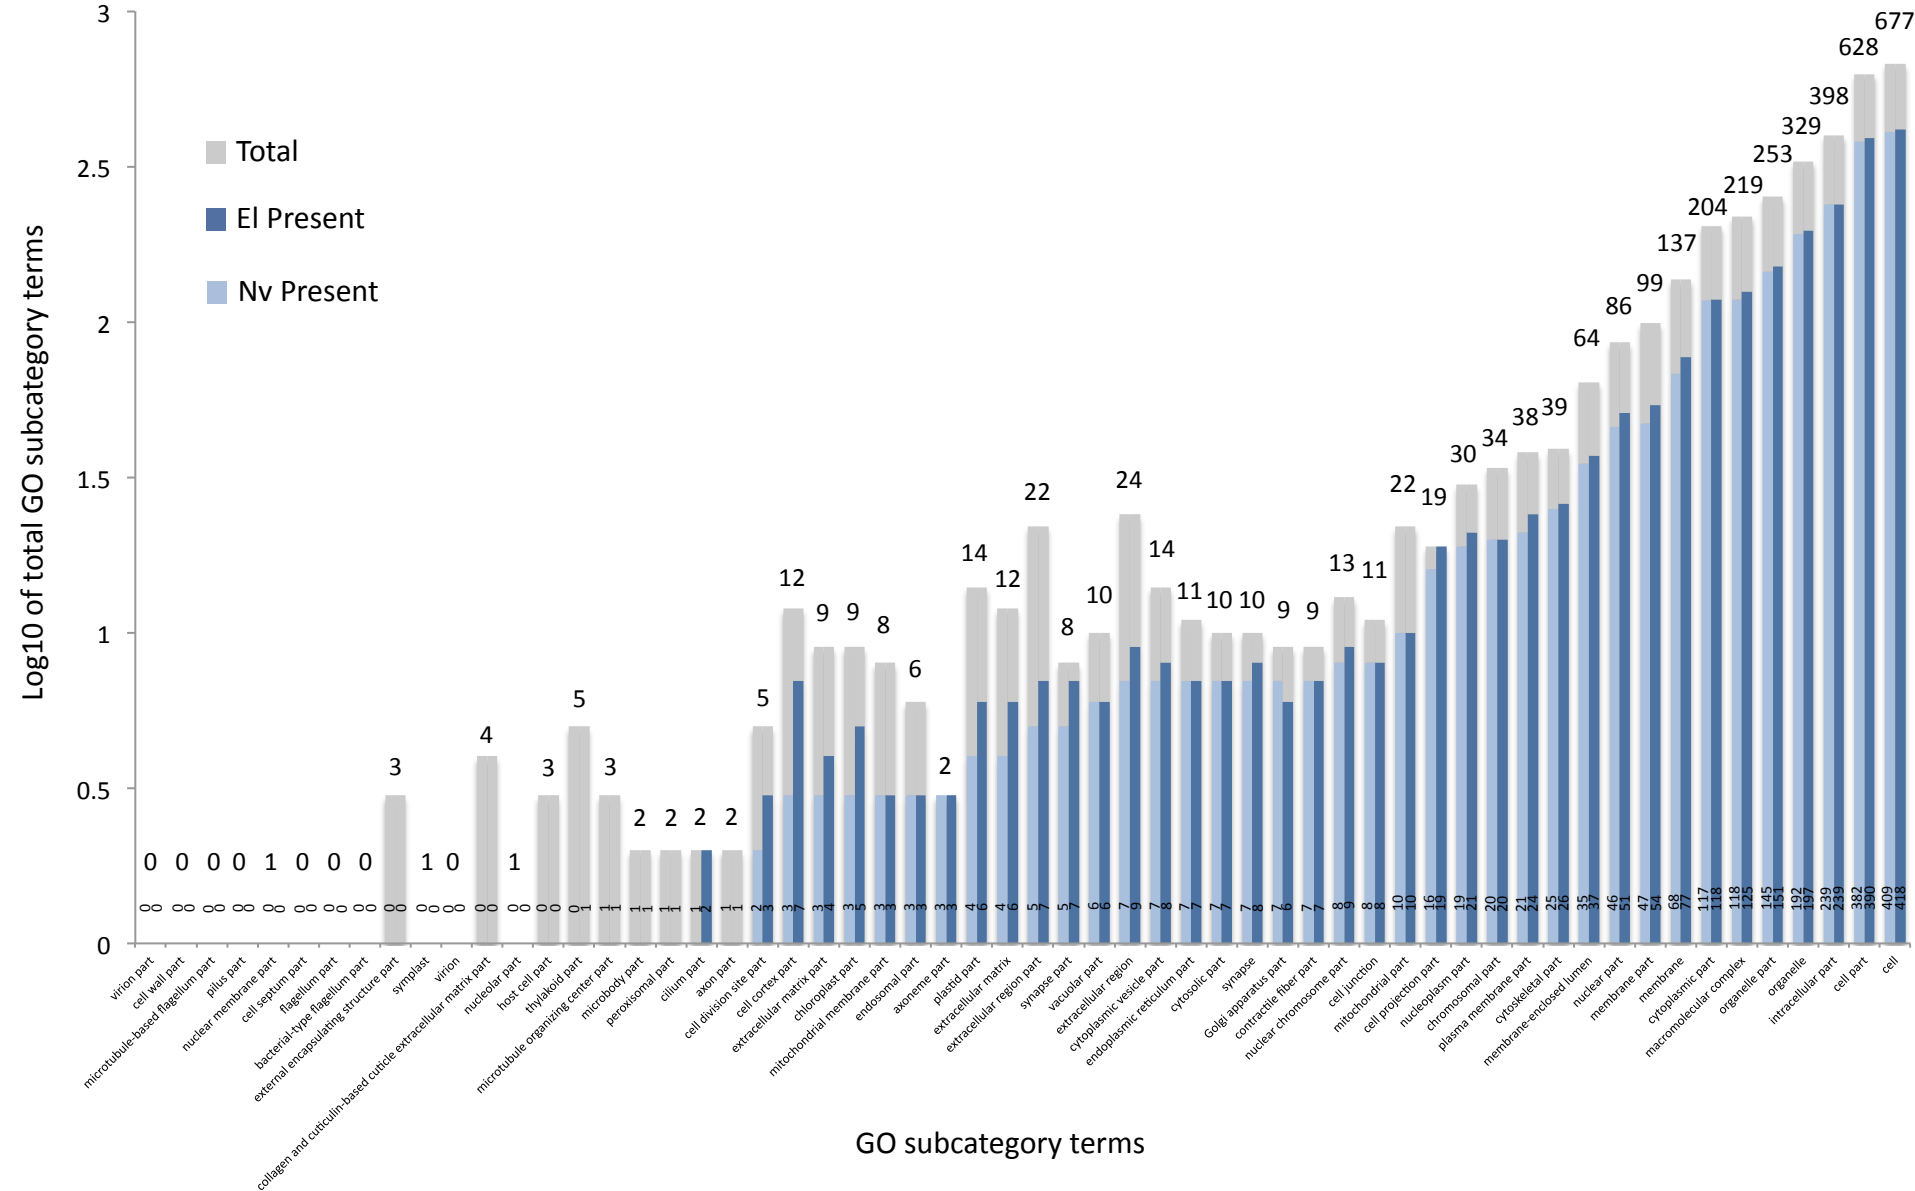

Supplement: 1471-2164-15-71-S6.pdf [file 1471-2164-15-71-S6.pdf]
